# Supplementary material for: APOE ε4-related structural vulnerability in mild cognitive impairment: a subsystem-based analysis of the default mode network
Source: Research Square preprint supplement (doi:10.21203/rs.3.rs-9447482/v1), 2026-05-11
Supplement: Supplementary file 1 [file 099028ddc2d918407ef1aa91.doc]

| **ID** | **Abbreviation** | **Region Name** | **MNI_X** | **MNI_Y** | **MNI_Z** | **Volume（mm3）** |
| --- | --- | --- | --- | --- | --- | --- |
| 23 | REC_L | Left Rectus | -6 | 36 | -20 | 6816 |
| 24 | REC_R | Right Rectus | 8 | 34 | -20 | 5960 |
| 39 | PCC_L | Left Cingulate Post | -6 | -44 | 24 | 3704 |
| 40 | PCC_R | Right Cingulate Post | 8 | -44 | 20 | 2680 |
| 41 | HIP_L | Left Hippocampus | -26 | -22 | -12 | 7456 |
| 42 | HIP_R | Right Hippocampus | 28 | -20 | -12 | 7568 |
| 43 | PHG_L | Left ParaHippocampal | -20 | -18 | -22 | 7824 |
| 44 | PHG_R | Right ParaHippocampal | 24 | -16 | -22 | 9056 |
| 71 | PCUN_L | Left Precuneus | -8 | -58 | 46 | 28224 |
| 72 | PCUN_R | Right Precuneus | 10 | -58 | 42 | 26120 |
| 87 | TPOsup_L | Left Temporal Pole Sup | -40 | 14 | -22 | 10280 |
| 88 | TPOsup_R | Right Temporal Pole Sup | 48 | 14 | -18 | 10704 |
| 89 | MTG_L | Left Temporal_Mid | -56 | -34 | -4 | 39536 |
| 90 | MTG_R | Right Temporal_Mid | 58 | -38 | -2 | 35272 |

**Supplementary Table S1. MNI coordinates and volumes of the selected regions of interest (ROIs).**

Note: MNI, Montreal Neurological Institute. The region IDs and names are derived from the AAL (Automated Anatomical Labeling) atlas. Volumes represent the standard mask volume for each respective ROI in the atlas template.

**Supplementary Table S2. PERMANOVA results for the effects of Group and *APOE ε4* on the DMN and its sub-systems.**

| **Subsystem** | ***Df*** | | **Sum of Squares** | ***R²*** | ***F*** | ***p*** |
| --- | --- | --- | --- | --- | --- | --- |
| **Total DMN** |  |  | |  |  |  |
| Model (Group + *APOE ε4*) | 2 | 48.510 | | 0.036 | 3.242 | 0.005* |
| Residual | 173 | 1294.280 | | 0.964 |  |  |
| Total | 175 | 1342.790 | | 1.000 |  |  |
| **Medial Temporal Lobe (MTL)** |  |  | |  |  |  |
| Model (Group + *APOE ε4*) | 2 | 31.550 | | 0.057 | 5.268 | 0.008* |
| Residual | 173 | 518.040 | | 0.943 |  |  |
| Total | 175 | 549.590 | | 1.000 |  |  |
| **Midline Core (PCUN, PCC)** |  |  | |  |  |  |
| Model (Group + *APOE ε4*) | 2 | 13.260 | | 0.020 | 1.759 | 0.164 |
| Residual | 173 | | 652.040 | 0.980 |  |  |
| Total | 175 | | 665.300 | 1.000 |  |  |
| **Dorsomedial Prefrontal (DMPFC)** |  | |  |  |  |  |
| Model (Group + *APOE ε4*) | 2 | | 3.277 | 0.050 | 4.162 | 0.003* |
| Residual | 173 | | 68.112 | 0.950 |  |  |
| Total | 175 | | 71.389 | 1.000 |  |  |

Notes: PERMANOVA = Permutational Multivariate Analysis of Variance; DMN = Default Mode Network; Df = Degrees of freedom; R² = proportion of variance explained. The distance matrices were tested using 10,000 permutations under a reduced model.

* p < 0.0125 (Bonferroni-corrected for 4 multiple comparisons).

**Supplementary Table S3. Comparison of standardized ROI variables between *APOE ε4* carriers and non-carriers in the cognitively normal (CN) and mild cognitive impairment (MCI) groups.**

| **Variable** | **Statistical Test** | **Statistic** | ***p*** | **FDR *q*** | **Effect Size** | **95% CI (Lower)** | **95% CI (Upper)** |
| --- | --- | --- | --- | --- | --- | --- | --- |
| 1. **Cognitively Normal (CN)** |  |  |  |  |  |  |  |
| HIP_std | t-test | 0.80 | 0.428 | 0.599 | -0.21(*d*) | -0.72 | 0.31 |
| PHG_std | t-test | 1.36 | 0.178 | 0.474 | -0.35 (*d*) | -0.87 | 0.17 |
| REC_std | t-test | 1.29 | 0.203 | 0.474 | -0.33 (*d*) | -0.85 | 0.19 |
| PCUN_std | t-test | 1.35 | 0.181 | 0.474 | -0.35 (*d*) | -0.87 | 0.17 |
| TPOsup_std | t-test | 0.02 | 0.984 | 0.984 | -0.01 (*d*) | -0.52 | 0.51 |
| MTG_std | Wilcoxon | 507 | 0.404 | 0.599 | 1.16 (*r_rb*) | 0.86 | 1.45 |
| PCC_std | Wilcoxon | 428 | 0.751 | 0.876 | 0.98 (*r_rb*) | 0.70 | 1.29 |
|  |  |  |  |  |  |  |  |
| 1. **Mild Cognitive Impairment (MCI)** |  |  |  |  |  |  |  |
| HIP_std | t-test | 1.44 | 0.153 | 0.208 | -0.27 (*d*) | -0.64 | 0.10 |
| PHG_std | t-test | 1.94 | 0.055 | 0.129 | -0.36 (*d*) | -0.73 | 0.01 |
| PCUN_std | t-test | -0.18 | 0.856 | 0.856 | 0.03 (*d*) | -0.33 | 0.40 |
| TPOsup_std | t-test | 2.77 | 0.006 | 0.038* | -0.52 (*d*) | -0.89 | -0.14 |
| REC_std | t-test | 2.59 | 0.011 | 0.038* | -0.48 (*d*) | -0.85 | -0.11 |
| MTG_std | Wilcoxon | 1929 | 0.173 | 0.208 | 1.16 (*r_rb*) | 0.95 | 1.38 |
| PCC_std | Wilcoxon | 1926 | 0.179 | 0.208 | 1.16 (*r_rb*) | 0.95 | 1.36 |

Notes: CN = Cognitively Normal (N = 30 non-carriers, N = 30 carriers); MCI = Mild Cognitive Impairment (N = 58 non-carriers, N = 58 carriers); FDR = False Discovery Rate; CI = Confidence Interval. Effect sizes are reported as Cohen's *d (d)* for independent t-tests and rank-biserial correlation *(r_rb)* for Wilcoxon rank-sum tests. The statistic column represents the t-value for t-tests and the W-value for Wilcoxon tests.

* FDR *q* < 0.05.

**Supplementary Table S4. Multiple linear regression model predicting standardized TPOsup from *APOE ε4* copy number and covariates in MCI patients.**

| **Predictor Variables** | **Estimate (*β*)** | **Standard Error (SE)** | ***t*** | ***p*** |
| --- | --- | --- | --- | --- |
| (Intercept) | 4.287 | 0.541 | 7.922 | <0.001*** |
| *APOE ε4* copies | -0.109 | 0.055 | -1.972 | 0.051 |
| Age | 0.001 | 0.006 | 0.190 | 0.850 |
| Gender (Male) | 0.023 | 0.081 | 0.284 | 0.777 |
| Education (Years) | 0.001 | 0.015 | 0.086 | 0.932 |
| **Model Summary** |  |  |  |  |
| R² | 0.036 |  |  |  |
| Adjusted R² | 0.001 |  |  |  |
| F | 1.033 |  |  |  |

Notes: TPOsup = superior temporal pole; MCI = mild cognitive impairment; *APOE* = *apolipoprotein E*. Gender was dummy coded with female as the reference group (Male = 1, Female = 0).

*** p < 0.001.

**Supplementary Table S5. Sensitivity analysis of the association between *APOE ε4* allele dose and standardized TPOsup volume in the MCI group**

| **Predictor** | **β** | **SE** | **t** | **P value** |
| --- | --- | --- | --- | --- |
| *APOE ε4* allele dose | -0.109 | 0.055 | -1.972 | 0.051 |
| Age | 0.001 | 0.006 | 0.190 | 0.850 |
| Male sex | 0.023 | 0.081 | 0.284 | 0.777 |
| Education | 0.001 | 0.015 | 0.086 | 0.932 |

Multiple linear regression model with standardized TPOsup volume as the dependent variable. APOE ε4 allele dose was coded as 0, 1, or 2 copies. The model was adjusted for age, sex, and education. β indicates unstandardized regression coefficients; SE, standard error.

**Supplementary Table S6. Causal mediation analysis of *APOE ε4* on MMSE via TPOsup in the total sample.**

| **Effect Path** | **Estimate** | **95% CI Lower** | **95% CI Upper** | ***p*** |
| --- | --- | --- | --- | --- |
| Total Effect (*APOE ε4* → MMSE) | -0.889 | -1.706 | -0.066 | 0.033* |
| Indirect Effect (via TPOsup) | -0.171 | -0.415 | -0.002 | 0.044* |
| Direct Effect (*APOE ε4* → MMSE) | -0.718 | -1.544 | 0.119 | 0.098 |
| Proportion Mediated | 0.192 | -0.023 | 1.263 | 0.074 |

Notes: CI = Confidence Interval. The model was adjusted for age, sex, education, and diagnosis. Confidence intervals and p-values were estimated using a nonparametric bootstrap method with 5000 simulations (Total N = 176).

* p < 0.05.

**Supplementary Table S7. Pairwise comparisons of ROC curves using DeLong tests with Bonferroni correction.**

| **Comparison** | **Z statistic** | **Unadjusted *p*** | **Bonferroni-adjusted *p*** |
| --- | --- | --- | --- |
| TPOsup + *APOE ε4* vs TPOsup | -0.631 | 0.528 | 1.000 |
| TPOsup + *APOE ε4* vs *APOE ε4* | 1.715 | 0.086 | 0.345 |
| MMSE + TPOsup + *APOE ε4* vs MMSE | 0.912 | 0.362 | 1.000 |
| MMSE + TPOsup + *APOE ε4* vs TPOsup + *APOE ε4* | 4.951 | <0.001 | <0.001 |

Notes: DeLong tests were used for pairwise comparisons of ROC curves, and Bonferroni correction was applied for multiple testing. All models were adjusted for age, sex, and education in the full sample. ROC, receiver operating characteristic; MMSE, Mini-Mental State Examination.

**Supplementary Table S8. ROC-derived discriminative performance of models including TPOsup, *APOE ε4*, MMSE, and covariates in the MCI group.**

| **Model** | **AUC (95% CI)** | **Optimal threshold** | **Sensitivity, %** | | **Specificity, %** |
| --- | --- | --- | --- | --- | --- |
| TPOsup + covariates | 0.626 (0.541–0.710) | 0.686 | | 48.3 | 76.7 |
| *APOE ε4* + covariates | 0.541 (0.450–0.631) | 0.711 | | 16.4 | 95.0 |
| TPOsup + *APOE ε4* + covariates | 0.621 (0.536–0.706) | 0.699 | | 41.4 | 81.7 |
| MMSE + covariates | 0.839 (0.780–0.898) | 0.741 | | 62.9 | 91.7 |
| MMSE + TPOsup + *APOE ε4* + covariates | 0.847 (0.790–0.904) | 0.770 | | 61.2 | 95.0 |

Note: Abbreviations: AUC, area under the receiver operating characteristic curve; CI, confidence interval; MMSE, Mini-Mental State Examination. Covariates included age, sex, and education. Optimal threshold was determined using the maximum Youden index.

**Supplement Figure 1. Exploratory ROC curves for the discriminative performance of TPOsup and *APOE ε4.***


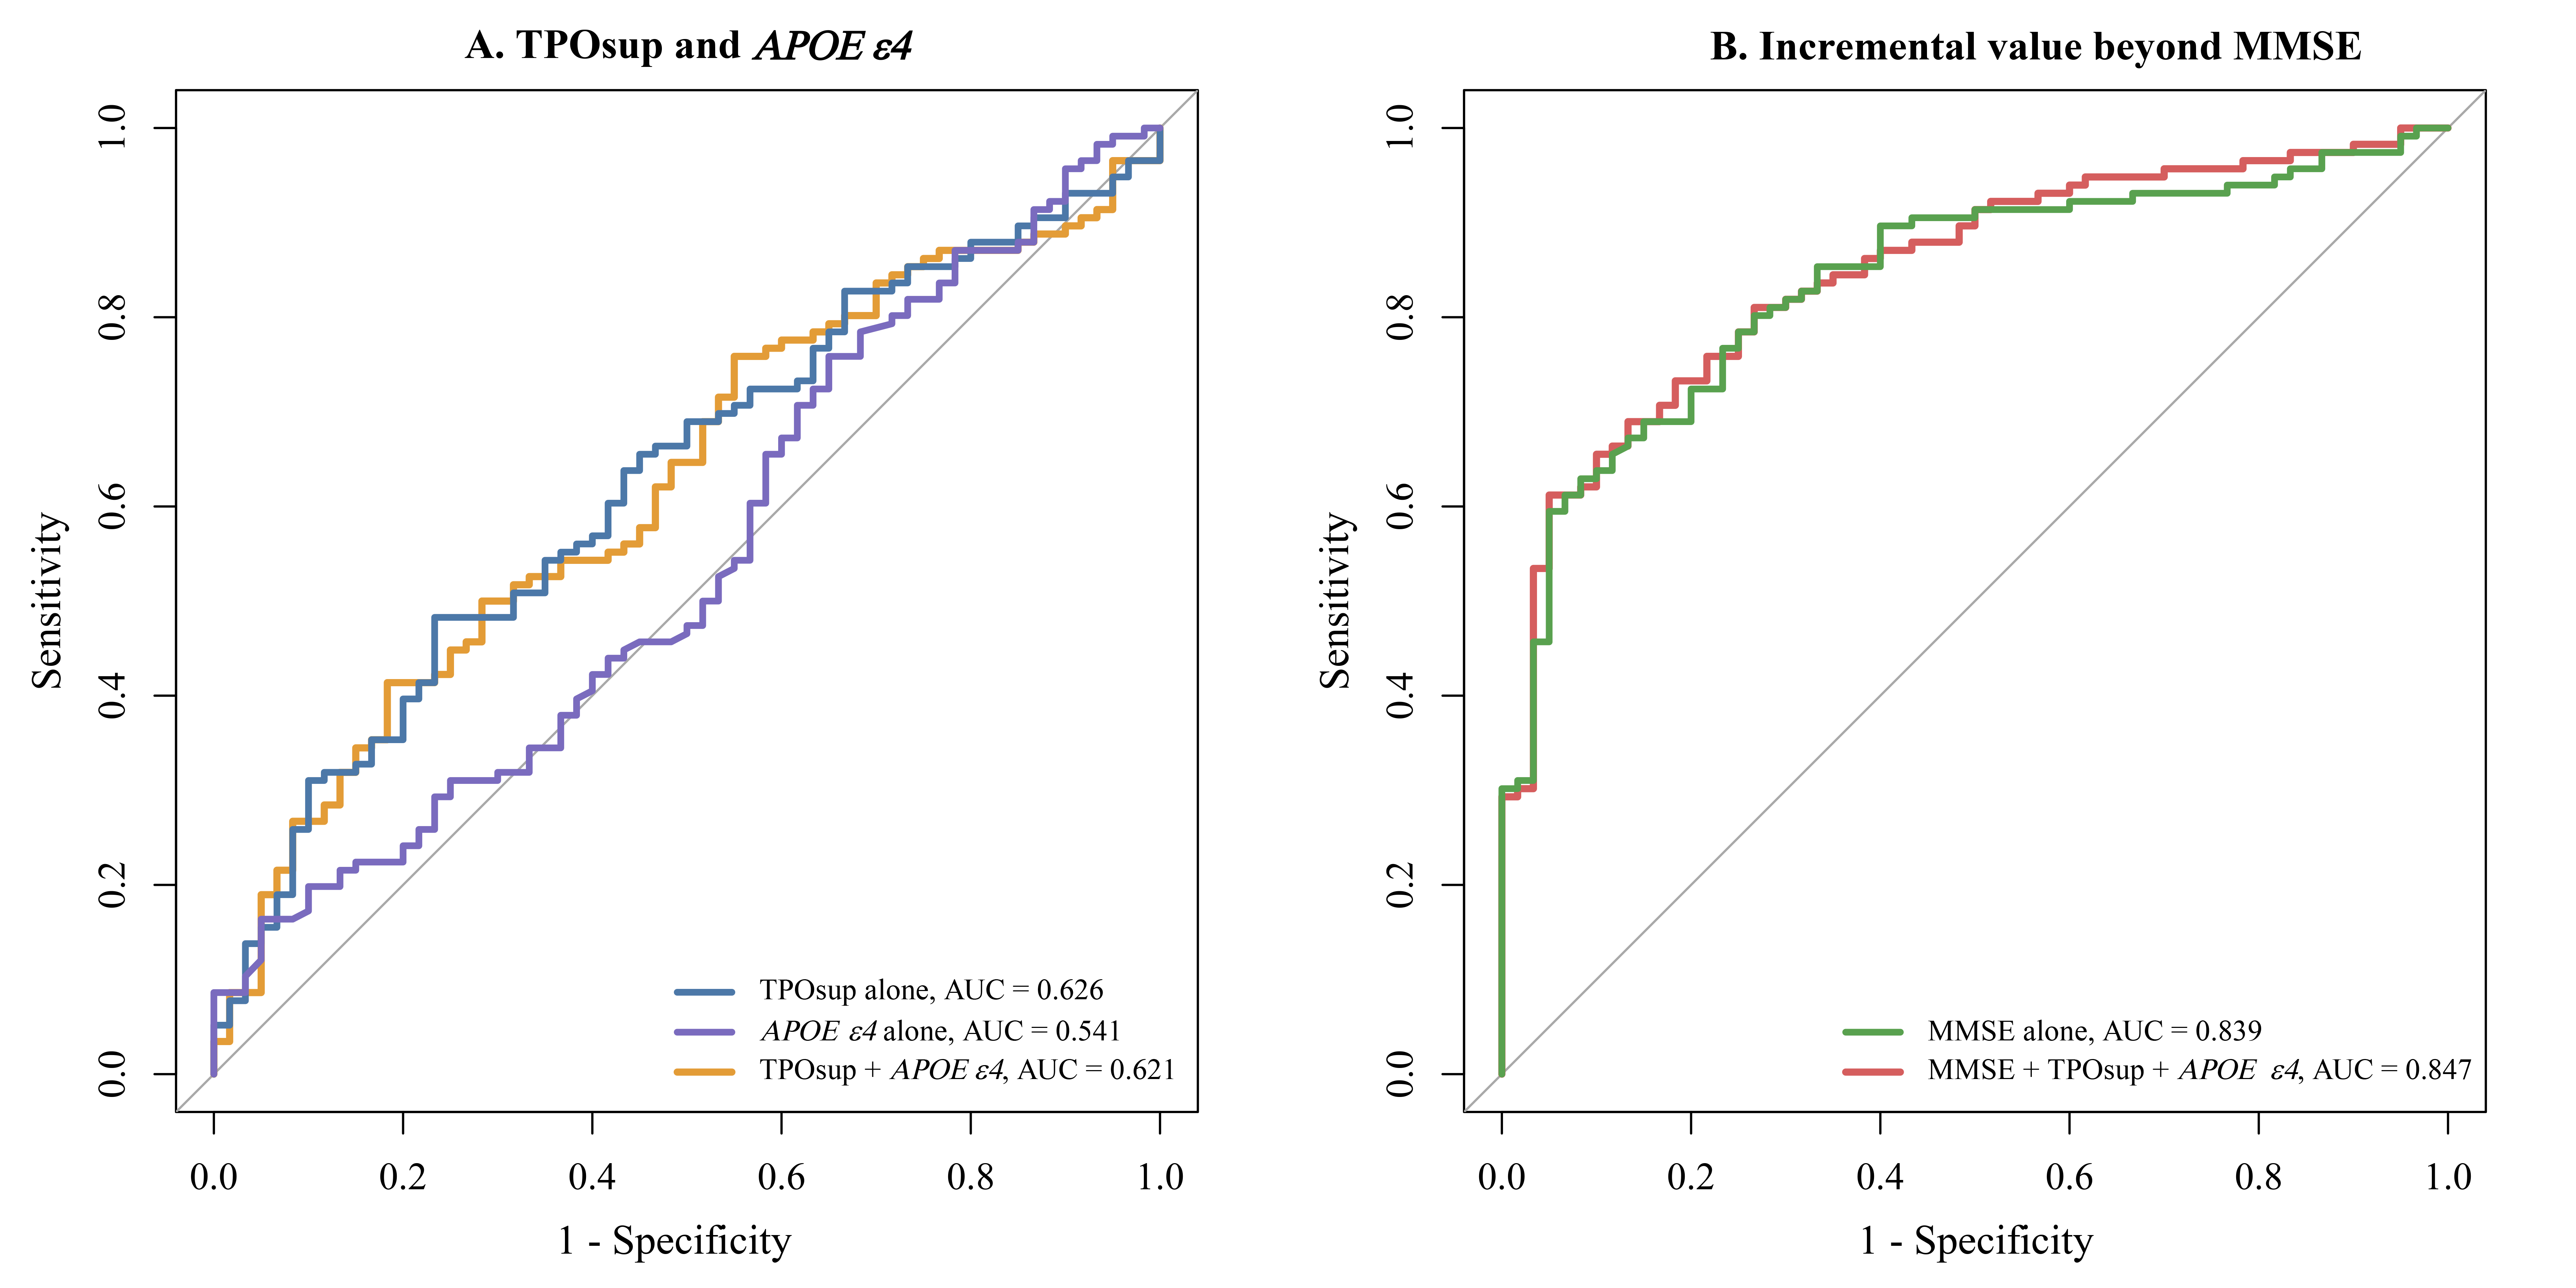


(A) ROC curves for models using TPOsup volume alone, *APOE ε4* carrier status alone, and the combined model using TPOsup volume and *APOE ε4* carrier status. The TPOsup volume alone model had moderate discriminative ability (AUC = 0.626), *APOE ε4* alone had limited discriminative ability (AUC = 0.541), and the combined model using TPOsup volume and *APOE ε4* had a similar AUC to the TPOsup volume alone model (AUC = 0.621).

(B) ROC curves comparing the model using MMSE alone and the combined model using MMSE, TPOsup volume, and *APOE ε4* carrier status. The model using MMSE alone had good discriminative ability (AUC = 0.839), and the combined model using MMSE, TPOsup volume, and *APOE ε4* had a slightly higher AUC (AUC = 0.847), indicating limited additional discriminative ability of the additional variables. The diagonal gray line represents chance level discrimination.
